# Supplementary material
Source: PubMed Central journal article supplement (PMC3084102)
Supplement: 1014125108_pnas.201014125SI.pdf [file 1014125108_pnas.201014125SI.pdf]

# Supporting Information

Stahl et al. 10.1073/pnas.1014125108

## SI Materials and Methods

**Mutant Construction.** Mutants in the genes *cj0481*, *cj0483*, *cj0486*, *cj0487*, and *cj0490* were constructed using a mutagenesis and gene-replacement strategy. The target gene was PCR-amplified using the primers listed in Table S3 and the genomic DNA of NCTC 11168 was used as the template. All primers used for these cloning reactions were designed for use with the In-fusion Dry down PCR cloning kit (Clontech). The PCR products were cloned into BamHI-digested pUC19 plasmids using the manufacturer's protocols. Once recombinant plasmids were obtained, they were used as a template for an inverse PCR, so as to delete regions within the gene, and create a site for the insertion of a chloramphenicol resistance cassette (*cat*). The primers used for the inverse PCR are listed in Table S3. The *cat* gene was amplified from pRY111 using Pfx polymerase (Invitrogen) and the primers indicated in Table S3. The *cat* gene was then cloned into the inverse PCR product using the Clontech kit, as above. Constructs were confirmed by sequencing and the recombinant plasmids were naturally transformed into motile *Campylobacter jejuni* NCTC 11168, as described previously (1, 2) by selecting for chloramphenicol resistance on MH agar. The exception to this protocol was the mutation of *cj0486*. The *C. jejuni* *cj0486* mutant was created by blunt insertion of the SmaI-cut 1488 bp kanamycin cassette from pWM2 into the SpeI-cut *C. jejuni* *cj0486* cloned into pBR322 described above. Electroporation of 1  $\mu$ g of this plasmid into *C. jejuni* NCTC 11168 was performed, as described previously (3), selecting for kanamycin-resistant *C. jejuni* transformants. Constructs were confirmed by PCR and sequence analysis of the recombinant gene.

***C. jejuni* Mutant Complementation.** The plasmid used to construct CjWM227a was kindly provided by Qijing Zhang (Iowa State University, Ames, IA). This construct contained the amplified region *cj0486-cj0490*, cloned into the pRRK vector (4) as described in by Muraoka et al. (5). This construct was transformed into the  $\Delta$ *cj0487* mutant to create the *cj0486-cj0490* complemented  $\Delta$ *cj0487* strain. To construct the  $\Delta$ *cj0486+* (*cj0486-cj0490*) strain, the pRRKcJ0486-cj0490 plasmid was digested with MfeI-HF to remove the kanamycin-resistance cassette and replace it with a chloramphenicol-resistance cassette. The resultant plasmid pRRC486-490 was transformed into the  $\Delta$ *cj0486* mutant.

**Complementation of an *Escherichia coli* *fucP* Mutant with *Ec-fucP* and *cj0486*.** The *fucP* genes from *Escherichia coli* and *C. jejuni* (*cj0486*) were PCR-amplified to contain ribosome binding sites. A 1,354-bp PCR product containing the *E. coli* *fucP* gene was obtained with oligonucleotides EfucP\_F, EfucP\_R, and chromosomal DNA of *E. coli* K12; a 1,317 bp *C. jejuni-fucP* containing PCR product was obtained using oligonucleotides CfucP\_F, CfucP\_R, and chromosomal DNA of *C. jejuni* NCTC11168. Full-length *E. coli* *fucP* and *C. jejuni* *cj0486* genes were cloned into BamHI or SalI cut pBR322 within the tetracycline gene. For further complementation analysis of the *E. coli* *fucP* mutant plasmid, pCE111-28 was linearized with EcoRV and ligated with the *fucP* gene containing PCR products. One positive candidate after restriction analyses with PstI (for the insertion and correct orientation of the *E. coli* *fucP* gene) or HindIII (for the insertion and correct orientation of the *C. jejuni* *fucP* gene) was used to complement the *E. coli* *fucP* mutant strain.

**Mucin Isolation and Electrospray Ionization Mass Spectrometry Analysis.** Intestinal sections (duodenum, jejunum, ileum, and

cecum) recovered from killed piglets, or ceca recovered from broiler chicks, were cut longitudinally to reveal the mucus lining. Luminal contents were removed by washing with PBS buffer and the internal surface was scraped into a microcentrifuge tube using a scalpel. The mucus was emulsified with 15% vol/vol 1 $\times$  PBS buffer and was centrifuged twice at 28,400  $\times$  *g* for 20 min to remove solid material. The crude mucin was washed in 70% ethanol and then dialyzed in MilliQ water and lyophilized overnight. All mucin samples were then treated with NaBH<sub>4</sub> and NaOH overnight at 42  $^{\circ}$ C ( $\beta$ -elimination) to release the *O*-linked glycans (6). Purified mucin *O*-glycans were analyzed using a 4000 Q-Trap (AB/MDS Sciex) equipped with a microspray interface. Precursor ion scans at *m/z* 224, corresponding to the fragment ion of the reducing end, were acquired with a scan time of 2 s at a step size of 0.5 Da. The collision energy was ramped from 40 to 80 V over the scan range of *m/z* 600 to 1,400.

**Confirmation of Operonic Structure.** The organization of the genes *cj0481* to *cj0490* was confirmed to be in an operonic structure by PCR amplification of regions spanning neighboring genes using cDNA as a template. Total RNA was extracted from cultures grown in medium containing L-fucose, as described earlier. The total RNA was converted to cDNA using SuperScript II reverse transcriptase (Invitrogen), following the manufacturer's protocols. To amplify the regions in between genes, the primers previously used for the inverse PCR step of mutant construction were used (Table S3). PCR products from the cDNA template were compared against products from a control genomic DNA template.

**Total RNA Extraction for Real-Time PCR and Microarray Studies.** Cultures of *C. jejuni* NCTC 11168 were inoculated into filter-sterilized MEM $\alpha$  medium containing 20  $\mu$ M FeSO<sub>4</sub> and 25 mM L-fucose, UV-sterilized MEM $\alpha$  medium containing 2 mg/mL porcine gastric mucin (Sigma) or control medium of MEM $\alpha$  containing 20 mM sodium pyruvate and 20  $\mu$ M FeSO<sub>4</sub>. Cultures were grown to an OD at 600 nm of 0.2, representing midlog phase, at which point the RNA quality was preserved by one of two methods. A 1/10-volume stop solution of 10% buffer saturated phenol (pH 4.3) and ethanol was added to the fucose-containing culture. However, this stop solution proved insufficient to preserve RNA quality in the mucin-containing culture so a 1/1 volume of RNA-later (Ambion) was used in this case. Total RNA was extracted using a hot-phenol extraction method as described previously (1, 2, 7). The RNA was treated twice with Dnase I (Epicentre) and the absence of genomic DNA was confirmed by PCR. Final RNA quality and quantity was ascertained using BioRad's Experion StdSensRNA system using the manufacturer's protocols.

**Microarray Hybridization and Analysis.** Microarray slides and labeled cDNA probes were prepared and hybridized as described previously (1, 2, 7). Complementary DNA probes from control cultures grown in MEM $\alpha$  containing pyruvate were labeled with indocarbocyanine [Cy3], and experimental samples, from cultures containing L-fucose or mucin were labeled with indocarbocyanine [Cy5]. Once prepared, the arrays were scanned with a laser-activated confocal scanner (ScanArray Gx; Perkin-Elmer) at a resolution of 10  $\mu$ m. The signal intensities of each spot were collected using ScanArray software. Spots exhibiting hybridization anomalies were excluded from the analysis. The raw median fluorescence intensity values were background-subtracted, and spots with background-subtracted values less than three times the SD of the local background in both channels were also excluded from further analysis.

Subsequently, the background-subtracted fluorescent intensity in each wavelength (channel 1 for Cy3 and channel 2 for Cy5) was normalized using the MIDAS software (available from TIGR, <http://www.tigr.org/software/>) and by applying a locally weighted linear regression (Lowess), as previously described (7). Microarray data were collected from three independent biological replicates and three technical replicates for each biological replicate, for a total of nine microarray slides for each condition. Each slide contained triplicates of each probe, yielding a total of 27 replicate spots for analysis. Finally, the ratio of channel 2 to channel 1 was converted to  $\log_2$ , and the data were statistically analyzed using the empirical Bayes method, as previously described (7).

**Quantitative RT-PCR.** Quantitative RT-PCR was conducted using the Applied Biosystems 7300 DNA analyzer and the Qiagen Quantitect SYBR Green RT-PCR kit using the manufacturer's protocols and as described previously (1). Each sample used total RNA that was extracted from cultures of *C. jejuni* NCTC11168,  $\Delta cj0481$ ,  $\Delta cj0486$ ,  $\Delta cj0487$ , and the complemented strains:  $\Delta cj0486+(cj0486-cj0490)$  and  $\Delta cj0487+(cj0486-cj0490)$ , grown in MEM $\alpha$  supplemented with 25 mM L-fucose. RNA expression relative to the wild-type control was determined for the genes *cj0480c*, *cj0481*, *cj0486*, and *cj0487*, with *rpsL* acting as an endogenous control.

## SI Results

**Intestinal Mucin O-glycan Compositions Differ in Chickens and Pigs.** Because intestinal mucin glycoproteins are heavily glycosylated with O-linked glycans, we characterized the neutral and acidic O-glycans released from porcine and chicken gastrointestinal mucins to identify differences in glycan composition between these two model systems that may be relevant to *C. jejuni* disease. Although both chicken and pig mucin O-glycans showed similar levels of fucosylation, the fucosylated oligosaccharides from chicken mucin were predominantly sulfated (38% versus 11–14% in the pig samples) and contained relatively low amounts of NeuAc (Fig. S5). In contrast, the pig mucin O-glycans showed very little modification with sulfate, but contained greater amounts of NeuAc and also NeuGc (Fig. S5). The lack of de-

tectable NeuGc in chick mucins is consistent with what has recently been reported (8).

**Genes *cj0481* to *cj0490* Exist as a Single Operon.** We used PCR of sections spanning neighboring genes and cDNA derived from extracted total RNA to confirm that the genes *cj0481* to *cj0490* are expressed as a single transcript. PCR products were obtained from regions spanning each pair of genes *cj0481-cj0483*, *cj0483-cj0484*, *cj0484-cj0485*, *cj0485-cj0486*, *cj0486-cj0487*, and *cj0487-cj0490*. Each of these products was of equal size to the product obtained from a genomic DNA template. The exception to this was the region in between *cj0480c* and *cj0481*. As these genes are oriented in opposite directions, they should not be transcriptionally linked. A product was obtained from the genomic DNA template, but none from the cDNA template.

**Other Genes Transcriptionally Regulated in the Presence of L-Fucose.** Cultures grown in the presence of L-fucose also exhibited an up-regulation of metabolic genes, including most of the citric acid cycle, proline metabolism (*putAB*), and genes involved in aspartate/glutamate transport and metabolism (*peb1A*, *cj0919*, *cj0920*, *pebC*, *aspB*). Notable groups of genes exhibiting down-regulation included oxidative stress response genes (*ahpC*, *sodB*, *tpx*), elements of the electron transport chain (*cydAB*, *petABC*), chemotaxis (*cetAB*, *tlp4*), and the outer membrane protein (*omp50*).

**Disruption of the L-Fucose Permease Gene *cj0486* Disrupts Expression of Genes both Up and Downstream.** Quantitative RT-PCR was conducted on the mutants *cj0481*, *cj0486*, and *cj0487*, as well as mutants complemented with the region *cj0486-cj0490* (Fig. S3). Although the mutant *cj0481* exhibited slightly reduced expression of the downstream genes *cj0486* and *cj0487*, the mutants *cj0486* and *cj0487* saw little to no expression of other genes within the operon (in particular *cj0481* was not expressed in either mutant). Although restoring copies of the genes into an rRNA cluster within the genome partially restored expression of the target genes, this did not restore the expression of other genes within the operon. This finding could indicate that a higher level of transcription of the permease genes is necessary to allow for sufficient uptake of L-fucose to stimulate transcription of the operon.

1. Palyada K, et al. (2009) Characterization of the oxidative stress stimulon and PerR regulon of *Campylobacter jejuni*. *BMC Genomics* 10:481.
2. Reid AN, Pandey R, Palyada K, Naikare H, Stintzi A (2008) Identification of *Campylobacter jejuni* genes involved in the response to acidic pH and stomach transit. *Appl Environ Microbiol* 74:1583–1597.
3. Guerry P, Yao R, Alm RA, Burr DH, Trust TJ (1994) Systems of experimental genetics for *Campylobacter* species. *Methods Enzymol* 235:474–481.
4. Karlyshev AV, Wren BW (2005) Development and application of an insertional system for gene delivery and expression in *Campylobacter jejuni*. *Appl Environ Microbiol* 71:4004–4013.
5. Muraoka WT, Zhang Q (2011) Phenotypic and genotypic evidence for L-fucose utilization by *Campylobacter jejuni*. *J Bacteriol* 193:1065–1075.
6. Zhang J, Lindsay LL, Hedrick JL, Lebrilla CB (2004) Strategy for profiling and structure elucidation of mucin-type oligosaccharides by mass spectrometry. *Anal Chem* 76:5990–6001.
7. Palyada K, Threadgill D, Stintzi A (2004) Iron acquisition and regulation in *Campylobacter jejuni*. *J Bacteriol* 186:4714–4729.
8. Schauer R, Srinivasan GV, Coddeville B, Zanetta JP, Guérardel Y (2009) Low incidence of N-glycolylneuraminic acid in birds and reptiles and its absence in the platypus. *Carbohydr Res* 344:1494–1500.

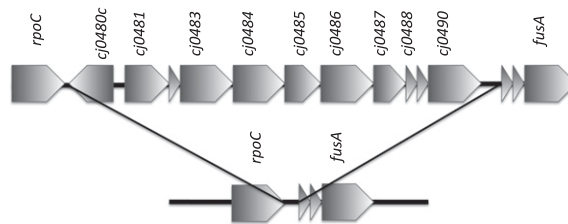

Fig. S1. Genomic region surrounding the putative fucose permease (*fucP*, *cj0486*). The upper strand is the region as it appears in *C. jejuni* strains NCTC 11168, RM1221, CF93-6, 84–25, *C. jejuni* subsp. *doylei* 269.97, and *C. coli* RM2228. The lower strand is the region as it appears in the strains lacking *fucP*: *C. jejuni* 81–176, CG8486, HB93-13, 260.94, and 81116.

|               |                                                                |     |
|---------------|----------------------------------------------------------------|-----|
| <i>EcFucP</i> | MGNTSIQTQSYRAVDKIDAGQSRYSYIIPFALLCSLFFLWAVANNLNILLPQFQQAFTLTN  | 60  |
| <i>Cj0486</i> | -----MTDSKNIKIAIVLVTSLEFLWGVSYGLIIVMNKFNQNLHHSQ                | 43  |
| <i>Cj0484</i> | -----MKHANSKLELVCKKISWRILPLIVLMPCLSMLEDRNTISFVKSHIETIDAGTGE    | 53  |
| <i>EcFucP</i> | FQAGLIQSIFYFYFIPIIPAGILMKKLSYKAGIITGLFLYALGAALFWPAAEIMNYTLF    | 120 |
| <i>Cj0486</i> | HESGFLQFAYFGAYFIALPAGYIANRFSYKMGIIIFGLALYATGALLIIPATNLASFHLF   | 103 |
| <i>Cj0484</i> | AAAYLGAGIFFIGYAIPEVPSNLFHLKLGAKIWLRSRIMITWGLVTMAMIFIQGEISFYVLL | 113 |
| <i>EcFucP</i> | LVGLFIIAAGLG--CLTAANPFVTVLGPESGHRFLNLAQTFISFGAIIAVVFGQSLIL     | 178 |
| <i>Cj0486</i> | LFAPFLLACGIG--SLTSANPYMTKLGDEKNASFRINAAQSFVGLGQFVGPPIIGGALFL   | 161 |
| <i>Cj0484</i> | RFLGLTEAGFSPGIIILYLSYFFPAIYRSKAYGIYQMGVPIAFVFGSLISGFILDYTPNI   | 173 |
| <i>EcFucP</i> | SNVPHQSQDVLDKMSPEQLSAYKHSLVLSVQTPYMIIVAILLVALLIMLTKFPALQSDN    | 238 |
| <i>Cj0486</i> | SITKQE-----EGASKEQIQAAALVANMGNVQLVYIGIAVIVILILIAFVANKLP--EGSA  | 214 |
| <i>Cj0484</i> | YFKNWQWMLIEGGITVLVGFICFLYLDLSDHPKDAKWLDIKEKIDILLKHIEISNTKAKDYS | 233 |
| <i>EcFucP</i> | HSDAKQGSFASLSRLARIRHWRWAVLAQFCYVGAQTACWSYLIRYAVEEIPGMTAGFAA    | 298 |
| <i>Cj0486</i> | VSDDYKQKDDSKPIYVFKRHRFNLGLLAQFLYIANQVAAGAFFINVVVEHNEGLKDAQCA   | 274 |
| <i>Cj0484</i> | IKDIFKS-----ILVWKFFVVFYFCIQLSVYGLFVLPKIAQILQINVGFEV            | 280 |
| <i>EvFucP</i> | NYLTGTMVCFPIGRFTGTWLISRFAHPKVLAAAYALIAMALCLISAFAGGHVGLIALTLCS  | 358 |
| <i>Cj0486</i> | YFYSIALVAFMLGRIVSTPLMKIIEKELKILGFYSLINVLICFSLYFASGFFSIVLLIALF  | 334 |
| <i>Cj0484</i> | GLLN--AIPWIFVPIALPIFTSLADKHSWNHALFLLLASLMIATSFVFNLAFLFF        | 338 |
| <i>EcFucP</i> | AFMSIQYPTIFSLGIKNLG-QDTKYGSSFIVMTIIG-----GGIVTPVMGFVSDAAGN-    | 410 |
| <i>Cj0486</i> | FFMSISFPTIFAVATKNLPLNQVKGSLVMSIVG-----GAIMPIIIGFINDHYGTG       | 388 |
| <i>Cj0484</i> | ISLAAIGFIVIQPIFWNLPTQVLKGRGAAAATALIGSLGNLGGFVAPTLLKTYIENHFQVE  | 398 |
| <i>EcFucP</i> | IPTAELIPALCFVAVIFARFRSQTATN--                                  | 438 |
| <i>Cj0486</i> | AGYLAMAPFLYVAWYGFVIGSKVRKNAKDF                                 | 418 |
| <i>Cj0484</i> | FGLIVLALITAIL-----                                             | 410 |

Fig. S2. The sequence alignment between the *E. coli* FucP, and the *C. jejuni* Cj0486 and Cj0484 proteins. The alignment was done using the online program ClustalW2 from EMBL-EBI, <http://www.ebi.ac.uk/Tools/msa/clustalw2/>. Highlighted in green are the amino acid residues Asp46, Glu135, and Asn146.

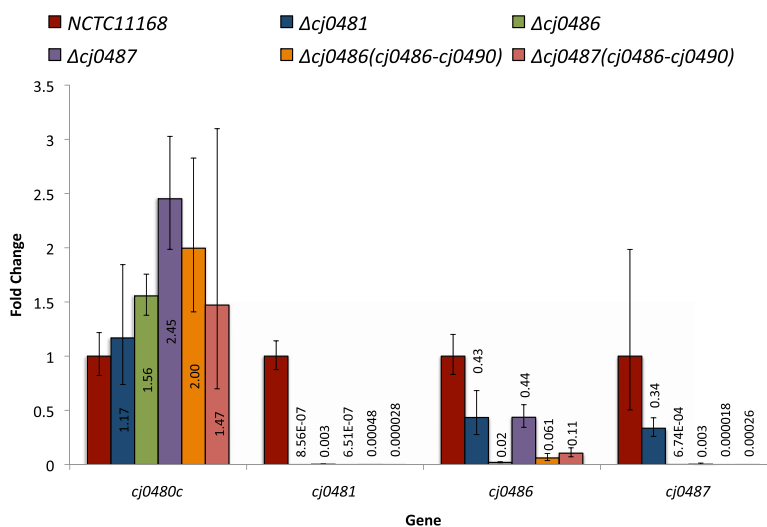

Fig. S3. Expression of the genes *cj0480c*, *cj0481*, *cj0486*, and *cj0487* as determined by real-time PCR from total RNA extracts from *C. jejuni* NCTC11168,  $\Delta cj0481$ ,  $\Delta cj0486$ ,  $\Delta cj0487$ , and the complemented strains:  $\Delta cj0486+(cj0486-cj0490)$  and  $\Delta cj0487+(cj0486-cj0490)$ . Results are displayed as fold-change relative to the *C. jejuni* NCTC11168 wild-type.

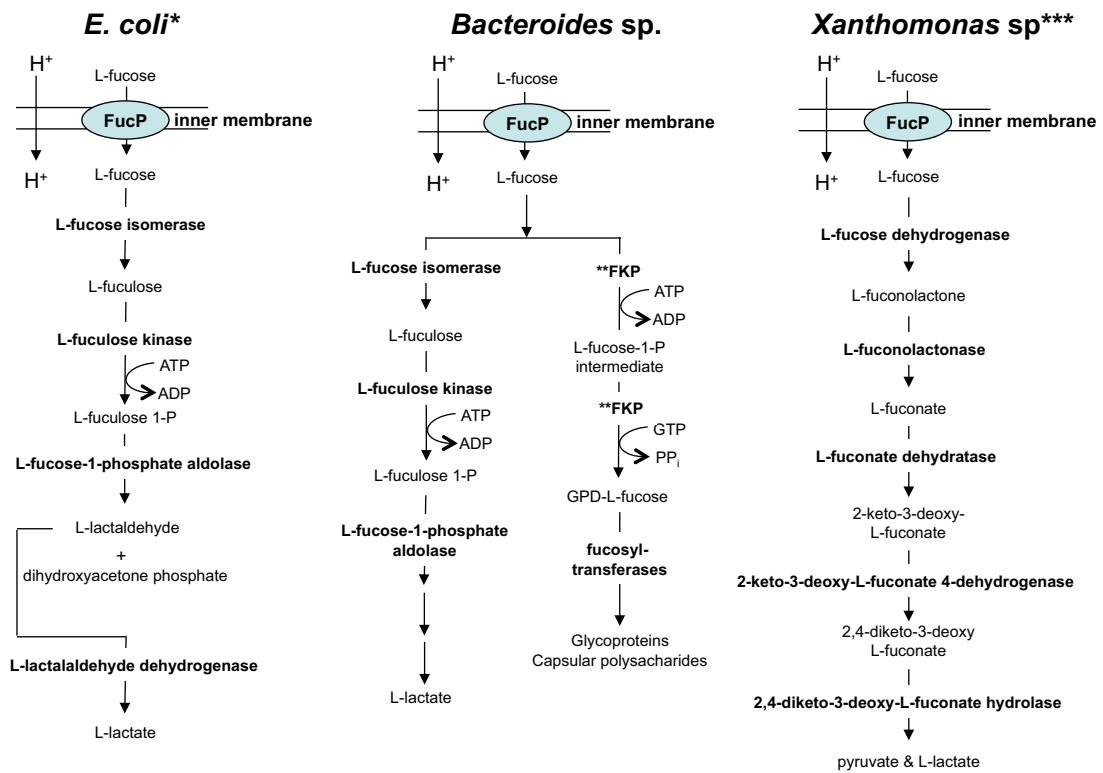

**Fig. S4.** General pathways for fucose uptake and utilization in *E. coli*, *Bacteroides* sp., and *Xanthomonas* sp. are depicted. FucP, fucose proton symporter of the major facilitator family; FucK, fucose kinase. Biosynthetic proteins are in bold; \*adapted from Baldomà and Aguilar (1), \*\*FKP: bifunctional L-fucokinase/ GDP-fucose pyrophosphorylase (2, 3); \*\*\*modified from Yew et al. (4)

1. Baldomà L, Aguilar J (1988) Metabolism of L-fucose and L-rhamnose in *Escherichia coli*: Aerobic-anaerobic regulation of L-lactaldehyde dissimilation. *J Bacteriol* 170:416–421.
2. Wang F, Xiao X, Saito A, Schrempf H (2002) *Streptomyces olivaceoviridis* possesses a phosphotransferase system that mediates specific, phosphoenolpyruvate-dependent uptake of N-acetylglucosamine. *Mol Genet Genomics* 268:344–351.
3. Coyne MJ, Reinap B, Lee MM, Comstock LE (2005) Human symbionts use a host-like pathway for surface fucosylation. *Science* 307:1778–1781.
4. Yew WS, et al. (2006) Evolution of enzymatic activities in the enolase superfamily: L-Fuconate dehydratase from *Xanthomonas campestris*. *Biochemistry* 45:14582–14597.

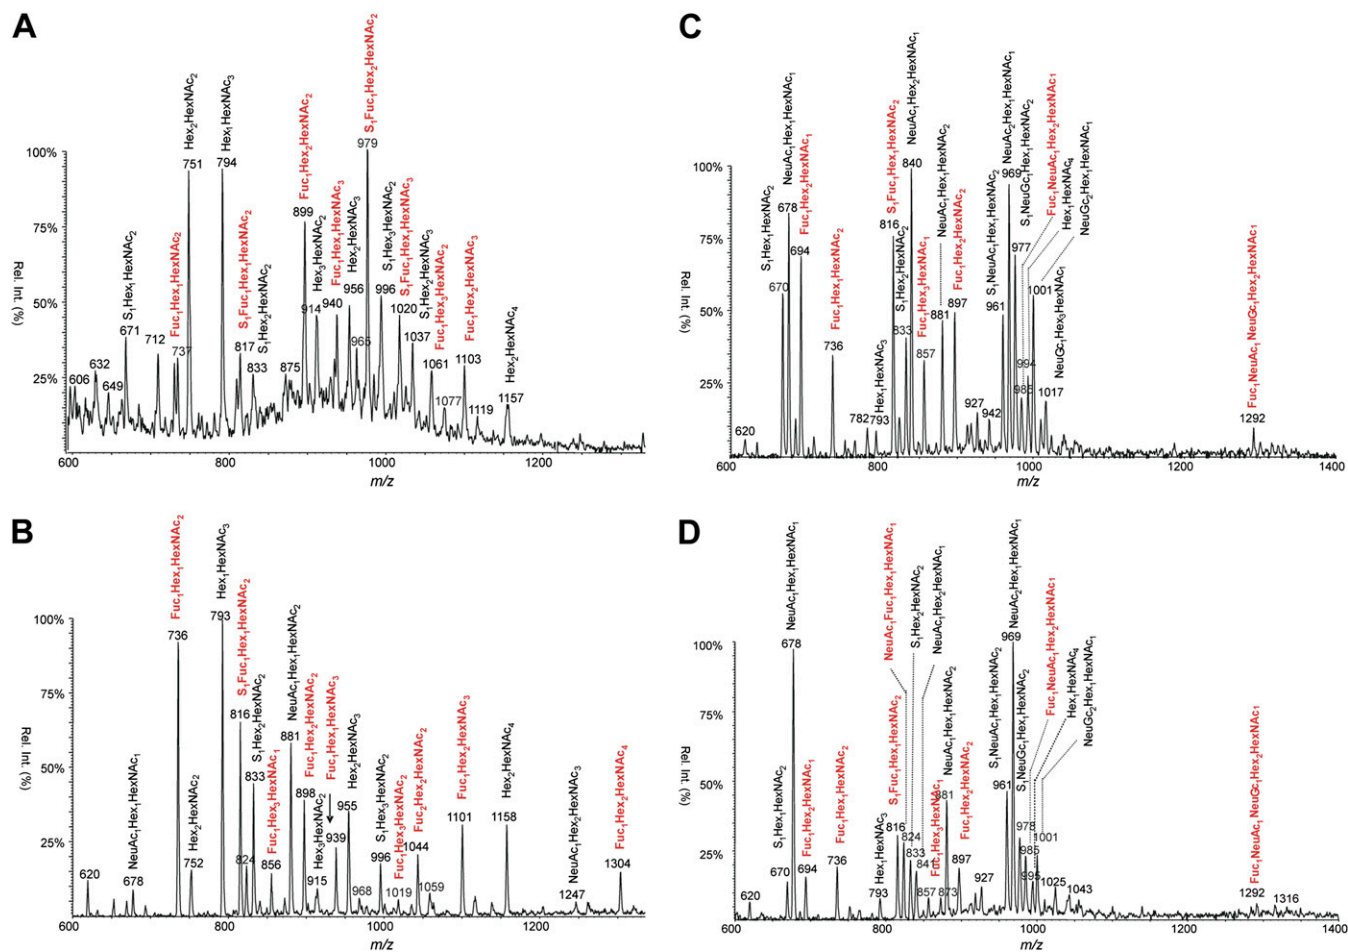

**Fig. S5.** Precursor ion mass spectra of ion at  $m/z$  224 (positive ion detection mode): (A) O-glycans released from chicken cecal mucin; (B) O-glycans released from pig gastric mucin (purchased from Sigma); (C) O-glycans released from piglet ileum; (D) O-glycans released from piglet cecum.

**Table S1. Complete list of genes identified to be differentially expressed in *C. jejuni* NCTC 11168 when grown in minimal media in the presence of 25  $\mu$ M L-fucose compared with growth in media lacking L-fucose: Fucose microarray**

| Gene number         | Gene name      | Fold-change log <sub>2</sub> | Bayes.p    | Genome annotation                                                  |
|---------------------|----------------|------------------------------|------------|--------------------------------------------------------------------|
| <b>Up-regulated</b> |                |                              |            |                                                                    |
| <b>cj0481</b>       | <b>dapA</b>    | 4.36611                      | 3.05E-11   | Putative dihydrodipicolinate synthase                              |
| <b>cj0483</b>       | <b>uxaA</b>    | 4.36413792                   | 4.40E-13   | Putative altronate hydrolase                                       |
| <b>cj0484</b>       | <b>cj0484</b>  | 3.74781682                   | 2.32E-11   | Putative MFS (Major Facilitator Superfamily) transport protein     |
| <b>cj0486</b>       | <b>cj0486</b>  | 3.69370417                   | 1.97E-11   | Putative sugar transporter                                         |
| <b>cj0485</b>       | <b>cj0485</b>  | 3.38307458                   | 4.27E-11   | Putative oxidoreductase                                            |
| <b>cj0487</b>       | <b>cj0487</b>  | 3.14743458                   | 4.22E-10   | Putative amidohydrolase                                            |
| <b>cj0490</b>       | <b>ald</b>     | 2.99369783                   | 6.14E-10   | Putative aldehyde dehydrogenase                                    |
| <b>cj1503c</b>      | <b>putA</b>    | 2.65269167                   | 2.78E-11   | Putative proline dehydrogenase                                     |
| <b>cj1502c</b>      | <b>putP</b>    | 2.535035                     | 1.03E-10   | Putative sodium/proline symporter                                  |
| <b>cj0917c</b>      | <b>cstA</b>    | 2.41062708                   | 2.50E-09   | Putative integral membrane protein                                 |
| <b>cj1537c</b>      | <b>acs</b>     | 2.31594208                   | 3.43E-10   | Acetyl-CoA synthetase                                              |
| <b>cj0488</b>       | <b>cj0488</b>  | 2.01624375                   | 3.53E-08   | Conserved hypothetical protein                                     |
| <b>cj0482</b>       | <b>uxaA</b>    | 1.91812375                   | 1.82E-09   | Putative altronate hydrolase                                       |
| <b>cj0921c</b>      | <b>peb1A</b>   | 1.87636                      | 4.81E-08   | Aspartate/glutamate-binding ABC transporter protein                |
| <b>cj0919c</b>      | <b>cj0919c</b> | 1.80535083                   | 8.53E-10   | Putative ABC-type amino acid transporter permease protein          |
| <b>cj1682c</b>      | <b>gltA</b>    | 1.70775458                   | 1.81E-09   | Citrate synthase                                                   |
| <b>cj0922c</b>      | <b>pebC</b>    | 1.56586042                   | 1.42E-08   | ABC-type amino acid transporter ATP-binding protein                |
| <b>cj0920c</b>      | <b>cj0920c</b> | 1.53398875                   | 3.99E-08   | Putative ABC-type amino acid transporter permease protein          |
| <b>cj1541</b>       | <b>cj1541</b>  | 1.50247792                   | 3.13E-11   | Conserved hypothetical protein                                     |
| <b>cj0021c</b>      | <b>cj0021c</b> | 1.43879667                   | 3.69E-09   | Putative fumarylacetoacetate (FAA) hydrolase family protein        |
| <b>cj1158c</b>      | <b>cj1158c</b> | 1.430605                     | 1.42E-05   | Small hydrophobic protein                                          |
| <b>cj0489</b>       | <b>ald</b>     | 1.41285565                   | 4.90E-07   | Putative aldehyde dehydrogenase                                    |
| <b>cj0074c</b>      | <b>cj0074c</b> | 1.3800625                    | 2.01E-10   | Putative iron-sulfur protein                                       |
| <b>cj0075c</b>      | <b>cj0075c</b> | 1.3614325                    | 1.57E-09   | Putative oxidoreductase iron-sulfur subunit                        |
| <b>cj0437</b>       | <b>sdhA</b>    | 1.35764458                   | 1.42E-06   | Succinate dehydrogenase flavoprotein subunit                       |
| <b>cj0438</b>       | <b>sdhB</b>    | 1.214365                     | 8.08E-06   | Putative succinate dehydrogenase iron-sulfur protein               |
| <b>cj1619</b>       | <b>kgpP</b>    | 1.21231                      | 2.21E-05   | $\alpha$ -Ketoglutarate permease                                   |
| <b>cj0073c</b>      | <b>cj0073c</b> | 1.18393542                   | 8.59E-08   | Conserved hypothetical protein                                     |
| <b>cj0835c</b>      | <b>acnB</b>    | 1.16229458                   | 1.85E-10   | Aconitate hydratase                                                |
| <b>cj0833c</b>      | <b>cj0833c</b> | 1.11848833                   | 1.83E-09   | Putative oxidoreductase                                            |
| <b>cj0689</b>       | <b>ackA</b>    | 1.09401826                   | 5.11E-09   | Acetate kinase                                                     |
| <b>cj1681c</b>      | <b>cysQ</b>    | 1.04634458                   | 8.37E-11   | CysQ protein homolog                                               |
| <b>cj1192</b>       | <b>dctA</b>    | 1.03423458                   | 1.09E-09   | Putative C4-dicarboxylate transport protein                        |
| <b>cj0533</b>       | <b>cj0533</b>  | 1.0199275                    | 5.59E-09   | Putative integral membrane protein                                 |
| <b>cj0832c</b>      | <b>cj0832c</b> | 0.977855                     | 4.56E-13   | Putative Na <sup>+</sup> /H <sup>+</sup> antiporter family protein |
| <b>cj0853c</b>      | <b>hemL</b>    | 0.96895417                   | 3.07E-09   | Glutamate-1-semialdehyde 2,1-aminomutase                           |
| <b>cj0688</b>       | <b>pta</b>     | 0.96819375                   | 2.66E-08   | Putative phosphate acetyltransferase                               |
| <b>cj0522</b>       | <b>cj0522</b>  | 0.95287417                   | 1.45E-08   | Putative membrane protein                                          |
| <b>cj1625c</b>      | <b>sdaC</b>    | 0.92356917                   | 3.00E-10   | Amino acid transporter                                             |
| <b>cj0439</b>       | <b>sdhC</b>    | 0.91213167                   | 0.00011757 | Putative succinate dehydrogenase subunit C                         |
| <b>cj0850c</b>      | <b>cj0850c</b> | 0.90949087                   | 5.03E-12   | Putative MFS (Major Facilitator Superfamily) transport protein     |
| <b>cj1388</b>       | <b>cj1388</b>  | 0.89035625                   | 1.19E-05   | Putative endoribonuclease L-PSP                                    |
| <b>cj0076c</b>      | <b>lctP</b>    | 0.88469348                   | 1.58E-08   | L-Lactate permease                                                 |
| <b>cj1542</b>       | <b>cj1542</b>  | 0.87182792                   | 9.77E-08   | Putative allophanate hydrolase subunit 1                           |
| <b>cj0427</b>       | <b>cj0427</b>  | 0.84059                      | 4.65E-09   | Hypothetical protein                                               |
| <b>cj0203</b>       | <b>cj0203</b>  | 0.82591125                   | 1.92E-12   | Putative citrate transporter                                       |
| <b>cj0903c</b>      | <b>cj0903c</b> | 0.80671125                   | 1.33E-06   | Putative amino acid transport protein                              |
| <b>cj0982c</b>      | <b>cjaA</b>    | 0.79958792                   | 1.36E-11   | Putative amino acid transporter periplasmic solute-binding protein |
| <b>cj0762c</b>      | <b>aspB</b>    | 0.78819083                   | 1.35E-06   | Aspartate aminotransferase                                         |
| <b>cj0393c</b>      | <b>mgo</b>     | 0.78807833                   | 4.02E-09   | Putative malate:quinone oxidoreductase                             |
| <b>cj0834c</b>      | <b>cj0834c</b> | 0.78551348                   | 5.66E-08   | Ankyrin repeat-containing putative periplasmic protein             |
| <b>cj1543</b>       | <b>cj1543</b>  | 0.76831917                   | 3.90E-10   | Putative allophanate hydrolase subunit 2                           |
| <b>cj1624c</b>      | <b>sdaA</b>    | 0.72731542                   | 1.28E-07   | L-Serine dehydratase                                               |
| <b>cj1389</b>       | <b>cj1389</b>  | 0.71259182                   | 7.42E-07   | Pseudogene (putative C4-dicarboxylate anaerobic carrier)           |
| <b>cj0534</b>       | <b>sucD</b>    | 0.70539083                   | 2.65E-11   | Succinyl-coA synthetase $\alpha$ chain                             |
| <b>cj0554</b>       | <b>cj0554</b>  | 0.69407667                   | 2.00E-06   | Hypothetical protein                                               |
| <b>cj0533</b>       | <b>sucC</b>    | 0.67438458                   | 1.57E-10   | Succinyl-coA synthetase $\beta$ chain                              |
| <b>cj1200</b>       | <b>cj1200</b>  | 0.64165539                   | 2.86E-05   | Putative NLPFA family lipoprotein                                  |
| <b>cj0531</b>       | <b>icd</b>     | 0.63176625                   | 4.58E-09   | Isocitrate dehydrogenase                                           |
| <b>cj1719c</b>      | <b>leuA</b>    | 0.62830458                   | 1.63E-09   | 2-Isopropylmalate synthase                                         |
| <b>cj0373</b>       | <b>cj0373</b>  | 0.61054458                   | 2.23E-10   | Putative D-2-hydroxyacid dehydrogenase                             |

Table S1. Cont.

| Gene number           | Gene name      | Fold-change log <sub>2</sub> | Bayes.p    | Genome annotation                                                        |
|-----------------------|----------------|------------------------------|------------|--------------------------------------------------------------------------|
| <i>cj1008c</i>        | <i>aroB</i>    | 0.60434                      | 1.59E-09   | 3-Dehydroquinate synthase                                                |
| <i>cj0555</i>         | <i>cj0555</i>  | 0.60296727                   | 2.30E-09   | Putative dicarboxylate carrier protein MatC                              |
| <i>cj0069</i>         | <i>cj0069</i>  | 0.5911                       | 7.86E-08   | Hypothetical protein                                                     |
| <i>cj0981c</i>        | <i>cjaB</i>    | 0.58550875                   | 2.96E-07   | Putative MFS (Major Facilitator Superfamily) transport protein           |
| <i>cj1717c</i>        | <i>leuC</i>    | 0.58027391                   | 1.42E-08   | 3-Isopropylmalate dehydratase large subunit                              |
| <i>cj0374</i>         | <i>cj0374</i>  | 0.5777755                    | 6.82E-07   | Conserved hypothetical protein                                           |
| <i>cj0987c</i>        | <i>cj0987c</i> | 0.56922083                   | 1.36E-07   | Putative MFS (Major Facilitator Superfamily) transport protein           |
| <i>cj0348</i>         | <i>trpB</i>    | 0.56829625                   | 3.04E-06   | Tryptophan synthase beta chain                                           |
| <i>cj0536</i>         | <i>oorA</i>    | 0.55900417                   | 1.46E-11   | OORA subunit of 2-oxoglutarate:acceptor oxidoreductase                   |
| <i>cj0346</i>         | <i>trpD</i>    | 0.53065333                   | 6.20E-05   | Anthranilate synthase component II                                       |
| <i>cj0374</i>         | <i>cj0374</i>  | 0.52706261                   | 2.98E-08   | Conserved hypothetical protein Cj0374                                    |
| <i>cj0375</i>         | <i>cj0375</i>  | 0.513895                     | 6.32E-10   | Putative lipoprotein                                                     |
| <i>cj0532</i>         | <i>mdh</i>     | 0.50484125                   | 5.74E-09   | Malate dehydrogenase                                                     |
| <b>Down-regulated</b> |                |                              |            |                                                                          |
| <i>cj1185c</i>        | <i>petB</i>    | -0.5030075                   | 2.42E-06   | Putative ubiquinol-cytochrome C reductase cytochrome B subunit           |
| <i>cj0912c</i>        | <i>cysM</i>    | -0.5038296                   | 0.00012051 | cCysteine synthase                                                       |
| <i>cj1220</i>         | <i>groES</i>   | -0.503845                    | 4.72E-05   | 10 kDa chaperonin (cpn10)                                                |
| <i>cj0613</i>         | <i>pstS</i>    | -0.5137573                   | 3.20E-06   | Putative periplasmic phosphate binding protein                           |
| <i>cj1659</i>         | <i>p19</i>     | -0.5246338                   | 6.47E-08   | Periplasmic protein p19                                                  |
| <i>cj1688c</i>        | <i>secY</i>    | -0.5303296                   | 4.35E-06   | Preprotein translocase subunit                                           |
| <i>cj1001</i>         | <i>rpoD</i>    | -0.5452921                   | 9.37E-07   | RNA polymerase $\sigma$ factor ( $\sigma$ -70)                           |
| <i>cj0224</i>         | <i>argC</i>    | -0.54543                     | 4.95E-06   | <i>N</i> -acetyl- $\gamma$ -glutamyl-phosphate reductase                 |
| <i>cj0515</i>         | <i>cj0515</i>  | -0.5500692                   | 2.24E-08   | Putative periplasmic protein                                             |
| <i>cj0118</i>         | <i>cj0118</i>  | -0.5565643                   | 2.52E-05   | Conserved hypothetical protein                                           |
| <i>cj0012c</i>        | <i>rrc</i>     | -0.5577417                   | 3.25E-10   | Nonhaem iron protein                                                     |
| <i>cj0281</i>         | <i>tal</i>     | -0.5627229                   | 9.98E-07   | Putative transaldolase                                                   |
| <i>cj1511c</i>        | <i>fdhA</i>    | -0.5698267                   | 8.23E-07   | Putative formate dehydrogenase large subunit (Selenocysteine containing) |
| <i>cj1221</i>         | <i>groEL</i>   | -0.5822396                   | 7.97E-08   | 60 kDa chaperonin (cpn60)                                                |
| <i>cj0082</i>         | <i>cydB</i>    | -0.5890079                   | 3.96E-05   | Cytochrome bd oxidase subunit II                                         |
| <i>cj0343c</i>        | <i>cj0343c</i> | -0.6022113                   | 8.88E-05   | Putative integral membrane protein                                       |
| <i>cj0081</i>         | <i>cydA</i>    | -0.6309096                   | 4.68E-05   | Cytochrome bd oxidase subunit I                                          |
| <i>cj1190c</i>        | <i>cetA</i>    | -0.6329646                   | 0.00026076 | Bipartate energy taxis response protein                                  |
| <i>cj0328c</i>        | <i>fabH</i>    | -0.6329863                   | 4.43E-06   | 3-Oxoacyl-[acyl-carrier-protein] synthase                                |
| <i>cj1438c</i>        | <i>cj1438c</i> | -0.6341713                   | 4.58E-07   | Putative CPS glycosyltransferase                                         |
| <i>cj1181c</i>        | <i>tsf</i>     | -0.6379096                   | 8.15E-08   | Elongation factor TS                                                     |
| <i>cj1184c</i>        | <i>petC</i>    | -0.6417317                   | 8.63E-09   | Putative ubiquinol-cytochrome C reductase cytochrome C subunit           |
| <i>cj1180c</i>        | <i>cj1180c</i> | -0.6453832                   | 2.54E-09   | Putative ABC transporter ATP-binding protein                             |
| <i>cj1514c</i>        | <i>cj1514c</i> | -0.6476025                   | 4.48E-09   | Hypothetical protein                                                     |
| <i>cj0134</i>         | <i>thrB</i>    | -0.6604627                   | 2.90E-07   | Putative homoserine kinase                                               |
| <i>cj1434c</i>        | <i>cj1434c</i> | -0.6673438                   | 1.24E-07   | Putative CPS glycosyltransferase                                         |
| <i>cj0475</i>         | <i>rplA</i>    | -0.67948                     | 6.65E-10   | 50S ribosomal protein L1                                                 |
| <i>cj1474c</i>        | <i>ctsD</i>    | -0.6918808                   | 1.11E-07   | Putative type II protein secretion system D protein                      |
| <i>cj0117</i>         | <i>pfs</i>     | -0.6924929                   | 2.35E-08   | 5'-methylthioadenosine/S-adenosylhomocysteine nucleosidase               |
| <i>cj1612</i>         | <i>prfA</i>    | -0.7133457                   | 2.08E-07   | Peptide chain release factor 1                                           |
| <i>cj1596</i>         | <i>rplQ</i>    | -0.7141754                   | 1.14E-10   | 50S ribosomal protein L17                                                |
| <i>cj0343c</i>        | <i>cj0343c</i> | -0.7166329                   | 4.91E-05   | Putative integral membrane protein                                       |
| <i>cj1500</i>         | <i>cj1500</i>  | -0.7177971                   | 3.37E-06   | Putative integral membrane protein                                       |
| <i>cj0025c</i>        | <i>cj0025c</i> | -0.7422229                   | 5.74E-06   | Putative sodium:dicarboxylate family transmembrane symporter             |
| <i>cj0190</i>         | <i>cj0190c</i> | -0.7711905                   | 2.60E-05   | Conserved hypothetical protein                                           |
| <i>cj1189c</i>        | <i>cetB</i>    | -0.7724913                   | 6.90E-06   | Bipartate energy taxis response protein                                  |
| <i>cj0264c</i>        | <i>cj0264c</i> | -0.7761913                   | 4.05E-08   | Molybdopterin containing oxidoreductase                                  |
| <i>cj0265c</i>        | <i>cj0265c</i> | -0.8130454                   | 2.87E-09   | Putative cytochrome C-type haem-binding periplasmic protein              |
| <i>cj0370</i>         | <i>rpsU</i>    | -0.8188554                   | 2.71E-12   | 30S ribosomal protein S21                                                |
| <i>cj1153</i>         | <i>cj1153</i>  | -0.8466967                   | 2.36E-11   | Putative periplasmic cytochrome C                                        |
| <i>cj0779</i>         | <i>tpx</i>     | -0.8684075                   | 1.93E-06   | Thiol peroxidase                                                         |
| <i>cj0169</i>         | <i>sodB</i>    | -0.9068563                   | 6.42E-09   | Superoxide dismutase (Fe)                                                |
| <i>cj0379c</i>        | <i>cj0379c</i> | -0.9803817                   | 1.33E-07   | Putative molybdenum containing oxidoreductase                            |
| <i>cj0262c</i>        | <i>cj0262c</i> | -1.0401525                   | 8.48E-11   | Putative methyl-accepting chemotaxis signal transduction protein         |
| <i>cj1169c</i>        | <i>cj1169c</i> | -1.1581492                   | 1.17E-08   | Putative periplasmic protein                                             |
| <i>cj0239c</i>        | <i>cj0239c</i> | -1.3205179                   | 2.18E-07   | NifU protein homolog                                                     |
| <i>cj0334</i>         | <i>ahpC</i>    | -1.3638779                   | 4.18E-13   | Alkyl hydroperoxide reductase                                            |
| <i>cj0415</i>         | <i>cj0415</i>  | -1.3721392                   | 1.12E-06   | Putative GMC oxidoreductase subunit                                      |

**Table S1. Cont.**

| Gene number    | Gene name     | Fold-change log <sub>2</sub> | Bayes.p  | Genome annotation                           |
|----------------|---------------|------------------------------|----------|---------------------------------------------|
| <i>cj0240c</i> | <i>iscS</i>   | -1.3789683                   | 4.98E-07 | Cysteine desulfurase (NifS protein homolog) |
| <i>cj0414</i>  | <i>cj0414</i> | -1.5476567                   | 1.57E-07 | Putative oxidoreductase subunit             |
| <i>cj0453</i>  | <i>thiC</i>   | -1.6295863                   | 0        | Thiamin biosynthesis protein                |
| <i>cj0017c</i> | <i>dsbI</i>   | -1.7155813                   | 6.61E-10 | Disulphide bond formation protein           |
| <i>cj1170c</i> | <i>omp50</i>  | -1.8208058                   | 1.07E-08 | 50 kDa outer membrane protein precursor     |

Displayed are the gene numbers, name, fold-change in log<sub>2</sub>, *P* value, and annotated function. Boldface indicates genes belonging to the fucose operon.

**Table S2. Expression of the genes within the operon *cj0481–cj0490* in *C. jejuni* NCTC 11168 when grown in minimal media containing 2 mg/mL porcine gastric mucin compared with the control: Mucin microarray**

| Gene Number   | Gene name     | Fold-change log <sub>2</sub> | Genome annotation                                              |
|---------------|---------------|------------------------------|----------------------------------------------------------------|
| <i>cj0481</i> | <i>dapA</i>   | 1.862548148                  | Putative dihydrodipicolinate synthase                          |
| <i>cj0483</i> | <i>uxaA</i>   | 1.39661625                   | Putative altronate hydrolase                                   |
| <i>cj0484</i> | <i>cj0484</i> | 1.094871923                  | Putative MFS (Major Facilitator Superfamily) transport protein |
| <i>cj0485</i> | <i>cj0485</i> | 0.98345                      | Putative oxidoreductase                                        |
| <i>cj0486</i> | <i>cj0486</i> | 1.219888462                  | Putative sugar transporter                                     |
| <i>cj0487</i> | <i>cj0487</i> | 0.777173333                  | Putative amidohydrolase                                        |
| <i>cj0490</i> | <i>ald</i>    | 0.51669037                   | Putative aldehyde dehydrogenase                                |

Displayed are the gene numbers, name, fold change in log<sub>2</sub>, *P* value, and annotated function.

**Table S3. List of primers used in this study**

| Primer name                     | Sequence                                  |
|---------------------------------|-------------------------------------------|
| <b>Gene Cloning</b>             |                                           |
| <i>cj0481L</i>                  | CGGTACCCGGGGATCCAAAAGGAACTTTACCGGCTTTA    |
| <i>cj0481R</i>                  | CGACTCTAGAGGATCCTTGCTTCATCAAAGCGAGTG      |
| <i>cj0483L</i>                  | CGGTACCCGGGGATCCGGAGCAATGCCAATGTTTTT      |
| <i>cj0483R</i>                  | CGACTCTAGAGGATCCGCTCATCACGCACTTCTTCTT     |
| <i>cj0487L</i>                  | CGGTACCCGGGGATCCACCTTTGGGATTTGGAAAA       |
| <i>cj0487R</i>                  | CGACTCTAGAGGATCCCACTGGATAATTGCTCCCAAA     |
| <i>cj0490L</i>                  | ATGGCAAGAGATGAAAGCACAC                    |
| <i>cj0490R</i>                  | CCATCAGCTCCGCCTATGC                       |
| <b>Inverse PCR</b>              |                                           |
| <i>cj04811</i>                  | GAACTAAAGGGCGCAGCATAGGTGGAGTTTTTCCAG      |
| <i>cj04812</i>                  | GAACACCGCCGAGCAACTTGCTTCCACGCTCAA         |
| <i>cj04831</i>                  | GAACTAAAGGGCGCATTATGAATACACCAGGCAATGA     |
| <i>cj04832</i>                  | GAACACCGCCGAGCATGCAGCACTTCAAGCATT         |
| <i>cj04871</i>                  | GAACTAAAGGGCGCAGTTTTAAATCATCTAGGAAGTCCA   |
| <i>cj04872</i>                  | GAACACCGCCGAGCACGCTAAACAAAACAAAAGATTATGAA |
| <i>cj04901</i>                  | AGTGTGCAAAGATGCGGATA                      |
| <i>cj04902</i>                  | TAAAGCAGGTGCCATCTTCC                      |
| <b>Chloramphenicol cassette</b> |                                           |
| <i>catSE</i>                    | TGCTCGGCGGTGTTCTTTCCAAG                   |
| <i>catAS</i>                    | TGCGCCCTTAGTTCCTAAAGGGT                   |
| <b>Allelic replacement</b>      |                                           |
| <i>CfucP_F</i>                  | CGGGATCCTGGGATGAAAATAAGGAGTA              |
| <i>CfucP_R</i>                  | ACGCGTCGACAAAGGTGTAGATGAGCATCAA           |
| <i>EfucP_F</i>                  | CGGGATCCTGAACCTAAGAGGATGCTATG             |
| <i>EfucP_R</i>                  | ACGCGTCGACTTCAGTTAGTTGCCGTTTG             |
